# Supplementary material
Source: bioRxiv or medRxiv preprint supplement (https://www.biorxiv.org/highwire/filestream/101088/field_highwire_adjunct_files/8/324509-17.pdf)
Supplement: Supplementary file [file 324509-17.pdf]

**Supplementary Table 9. Latent parent viruses**

| ID  | Number of recombinant rebound sequences with both parents latent | Number of rebound SGA sequences isolated | Number of latent viruses that serve as parents | Parent viruses                                                             | Parent viruses are an expanded clone |
|-----|------------------------------------------------------------------|------------------------------------------|------------------------------------------------|----------------------------------------------------------------------------|--------------------------------------|
| 601 | 48                                                               | 52                                       | 5                                              | 601_D14_MB17                                                               | No                                   |
|     |                                                                  |                                          |                                                | 601_D14_MC13                                                               | No                                   |
|     |                                                                  |                                          |                                                | 601_D14_ME10                                                               | No                                   |
|     |                                                                  |                                          |                                                | 601_D14_2E_19                                                              | No                                   |
|     |                                                                  |                                          |                                                | 601_D14_2G_10                                                              | No                                   |
| 602 | 31                                                               | 31                                       | 3                                              | 602_W23_2Q_2                                                               | No                                   |
|     |                                                                  |                                          |                                                | 602_W23_2M_11                                                              | No                                   |
|     |                                                                  |                                          |                                                | 602_W23_2T_15                                                              | No                                   |
| 605 | 0                                                                | 10                                       | 2                                              | 605_W23_MK18                                                               | No                                   |
|     |                                                                  |                                          |                                                | 605_W23_MC1                                                                | No                                   |
| 608 | 4                                                                | 23                                       | 6                                              | 608_D14_MA7                                                                | No                                   |
|     |                                                                  |                                          |                                                | 608_W23_MO19                                                               | No                                   |
|     |                                                                  |                                          |                                                | 608_D14_MA9                                                                | No                                   |
|     |                                                                  |                                          |                                                | 608_D14_MJ8                                                                | No                                   |
|     |                                                                  |                                          |                                                | 608_W23_MR14                                                               | No                                   |
|     |                                                                  |                                          |                                                | 608_D14_MA9                                                                | No                                   |
| 609 | 11                                                               | 12                                       | 3                                              | 609_D14_MI23                                                               | No                                   |
|     |                                                                  |                                          |                                                | 609_D14_MI8                                                                | No                                   |
|     |                                                                  |                                          |                                                | 609_D14_MH15                                                               | No                                   |
| 611 | 25                                                               | 27                                       | 5                                              | 611_W23_P8_A6_FL                                                           | No                                   |
|     |                                                                  |                                          |                                                | 611_D14_2C_9                                                               | No                                   |
|     |                                                                  |                                          |                                                | 611_W23_2C_9                                                               | No                                   |
|     |                                                                  |                                          |                                                | 611_W23_P8_B1_FL                                                           | No                                   |
|     |                                                                  |                                          |                                                | 611_W23_2G_5                                                               | No                                   |
| 613 | 12                                                               | 12                                       | 3                                              | 613_W23_P7_H3_FL                                                           | No                                   |
|     |                                                                  |                                          |                                                | 613_W23_MS3                                                                | No                                   |
|     |                                                                  |                                          |                                                | [613_W23_MS18/613_W23_MAB_11/613_W23_3_MAA_20/613_W23_2J_14/613_W23_MR_21] | Yes                                  |
